# Supplementary material for: Senescence-related genes define prognosis, immune contexture, and pharmacological response in gastric cancer
Source: publisher site journal article supplement (doi:10.18632/aging.204524), 2023-02-16
Supplement: Supplementary file [file aging-v15i8-204524-supplementary-material-SD1.pdf]

SUPPLEMENTARY FIGURE

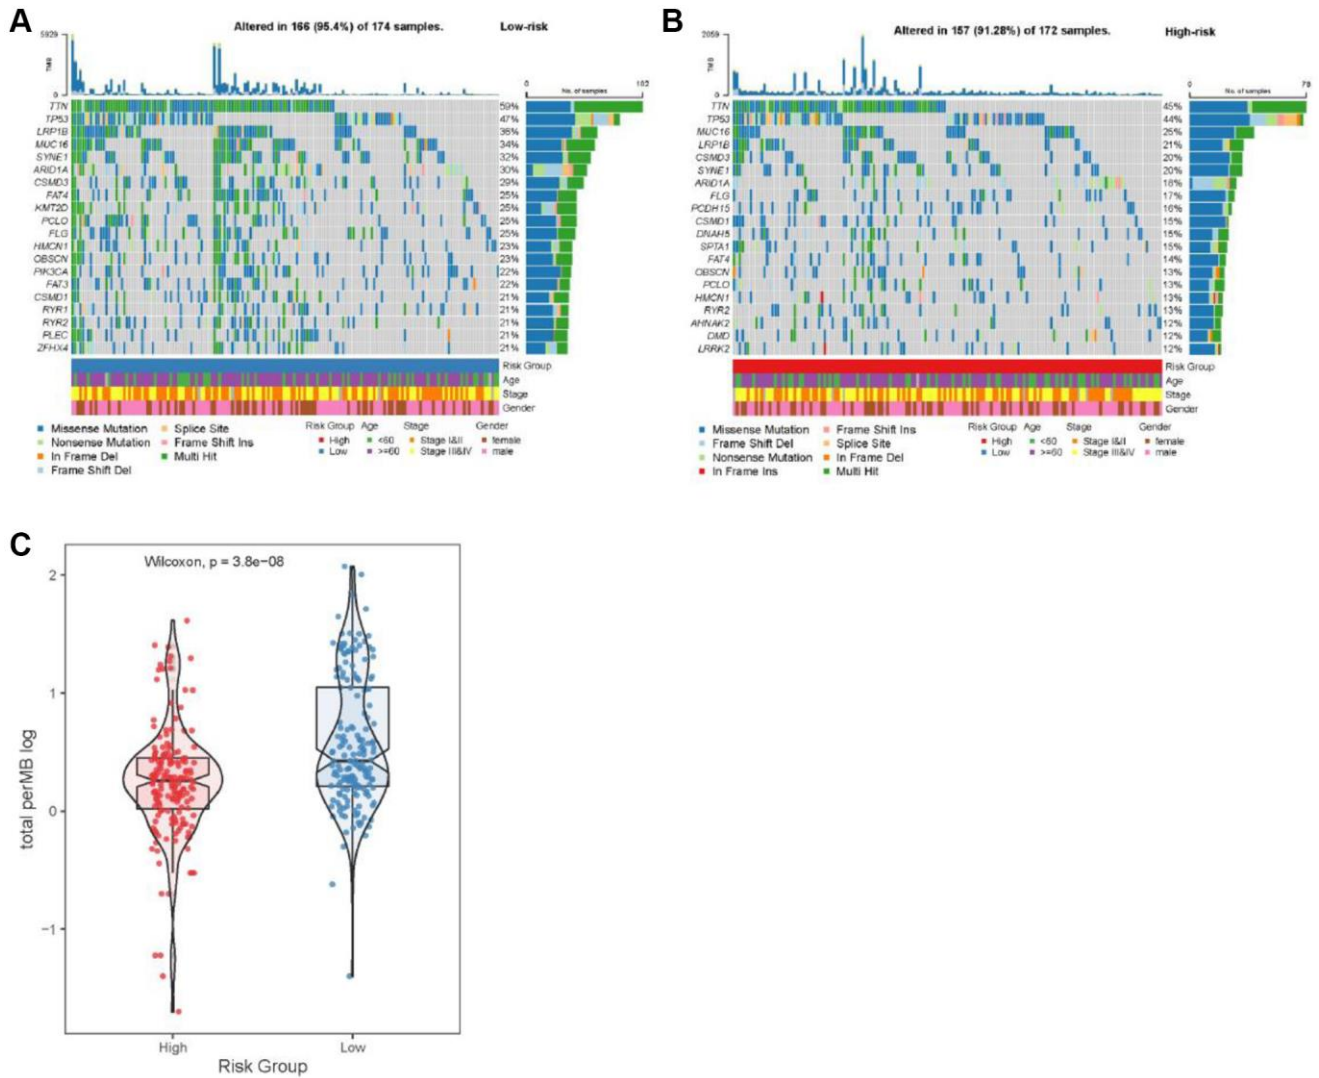

**Supplementary Figure 1. Somatic variants and TMB in the TCGA cohort.** (A) Oncoprint plot displaying the top 20 frequently mutated genes in low-risk groups. (B) Oncoprint plot displaying the top 20 frequently mutated genes in high-risk groups. (C) Somatic TMB between high- and low-risk groups in the TCGA cohort. Abbreviation: TMB: tumor mutational burden.
